# Supplementary material for: Peer Review of Grant Applications: A Simple Method to Identify Proposals with Discordant Reviews
Source: PLoS One. 2011 Nov 14;6(11):e27557. doi: 10.1371/journal.pone.0027557 (PMC3215721; doi:10.1371/journal.pone.0027557)
Supplement: Appendix S1 — Giraudeau et al . formula [9] . (DOC) [file pone.0027557.s001.doc]

**Appendix S1: Giraudeau *et al*. formula [9]**

Consider a dataset of *n* proposals, each proposal rated by *p* reviewers. Rho is the intraclass correlation coefficient (ICC) estimated from this dataset. We name as the ICC estimated after proposal *i0* has been discarded. Giraudeau *et al.* [9] demonstrated the following result:

where

VAR is the maximum likelihood global variance estimate (i.e., on the whole dataset);

is the squared difference between , the rating mean estimate for proposal *i0*, and *m*, the global mean estimate;

is the maximum likelihood intra-proposal variance estimate for proposal *i0*.

The first term is positive. The more differs from *m*, the higher the term.

The second term is negative. The higher the , the higher the term, in absolute value.
